# Supplementary material for: Neuroprotective Effect of Cyclo-(L-Pro-L-Phe) Isolated from the Jellyfish-Derived Fungus Aspergillus flavus
Source: Mar Drugs. 2021 Jul 26;19(8):417. doi: 10.3390/md19080417 (PMC8401322; doi:10.3390/md19080417)
Supplement: Supplementary file 1 [file marinedrugs-19-00417-s001.zip › marinedrugs-1304570 - supplementary .pdf]

## Article

# Neuroprotective effect of cyclo-(L-Pro-L-Phe) from the Jellyfish-derived fungus *Aspergillus flavus*

Dan-dan Li, Ying Wang, Eun La Kim and Jee H. Jung \*

<sup>1</sup> College of Pharmacy, Pusan National University, Busan 46241, Korea; leedany1992@gmail.com (D.-d.L.); wangrunhe829@gmail.com (Y.W.); eunlakim@gmail.com (E.L.K.)

\* Correspondence: jhjung@pusan.ac.kr

## Supplementary Materials and Methods

### Extraction and isolation

The fungus *Aspergillus flavus*, identified by ITS gene sequences (GenBank accession no.KR011759), was isolated from Jellyfish *Aurelia aurita* and saved in Marine Natural Product Laboratory, Pusan National University. The *Aspergillus flavus* fungus was cultured in 33 L YM medium (dissolved in 75% seawater) which included yeast extract (3.0 g/L), malt extract (3.0 g/L), peptone (5.0 g/L), and dextrose (10.0 g/L) for 21 days in a shaker platform with 130 rpm. After culture, the crude extract was extracted by EtOAC from the culture medium and separated by 90% methanol and *n*-hexane. The extract was collected from 90% methanol layer and eluted with 20%-100% methanol in step-gradient medium-pressure liquid chromatography (MPLC) (ODS-A, 120 Å, S-30/50 mesh). After that, we got 28 fractions. Fraction 5 (266.8 mg) was separated by RP-HPLC (YMC-triart C18, 250 × 10.0 mm, i.d. 5 µm) in 20% methanol / water, and 7 pure compounds (com 1: 0.6 mg; com 2: 1.84 mg; com 3: 3.96 mg; com 4: 3.58 mg; com 5: 1.06 mg; com 6: 0.79 mg; com 7: 9.95 mg) were obtained. Com 8 (5.55 mg) was got from fraction 10 using RP-HPLC (YMC-triart C18, 250 × 10.0 mm, i.d. 5 µm) in 40% methanol / water.

**Citation:** Li, D.-d.; Wang, Y.; Kim, E.L.; Jung, J.H. Neuroprotective effect of cyclo-(L-Pro-L-Phe) from the Jellyfish-derived fungus *Aspergillus flavus*. **2021**, *19*, 417. <https://doi.org/10.3390/md19080417>

Received: 2 July 2021

Accepted: 22 July 2021

Published: 26 July 2021

**Publisher's Note:** MDPI stays neutral with regard to jurisdictional claims in published maps and institutional affiliations.

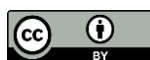

**Copyright:** © 2021 by the authors. Submitted for possible open access publication under the terms and conditions of the Creative Commons Attribution (CC BY) license (<http://creativecommons.org/licenses/by/4.0/>).

## Supplementary Results

## Primer Information

| Sequencing Primer Name | Primer Sequences                   | PCR Primer Name | Primer Sequences                   |
|------------------------|------------------------------------|-----------------|------------------------------------|
| ITS1                   | 5' (TCC GTA GGT GAA CCT GCG G) 3'  | ITS1            | 5' (TCC GTA GGT GAA CCT GCG G) 3'  |
| ITS4                   | 5' (TCC TCC GCT TAT TGA TAT GC) 3' | ITS4            | 5' (TCC TCC GCT TAT TGA TAT GC) 3' |

| Subject    |                    |        |       |     |          | Score |         | Identities  |         |
|------------|--------------------|--------|-------|-----|----------|-------|---------|-------------|---------|
| Accession  | Description        | Length | Start | End | Coverage | Bit   | E-Value | Match/Total | Pct.(%) |
| KY234273.1 | Aspergillus flavus | 819    | 4     | 815 | 99       | 1188  | 0.0     | 767/823     | 93      |

| Kingdom   | Family | Genus       | Species            |
|-----------|--------|-------------|--------------------|
| Eukaryota | -      | Aspergillus | Aspergillus flavus |

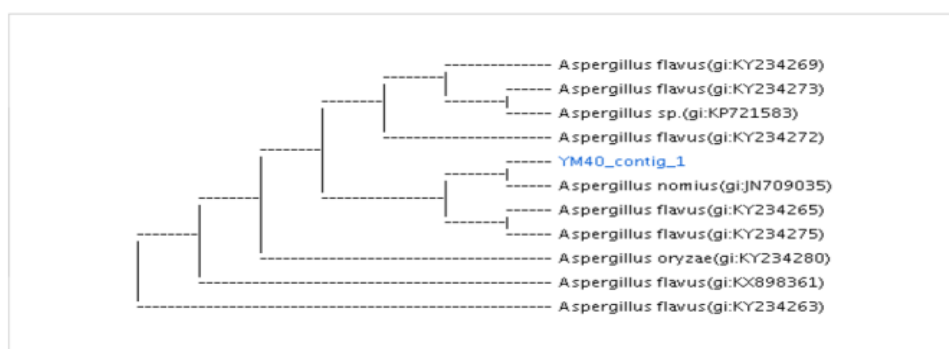

**Figure 1.** The fungus *Aspergillus flavus* was identified by ITS gene sequences (GenBank accession no.KR011759).

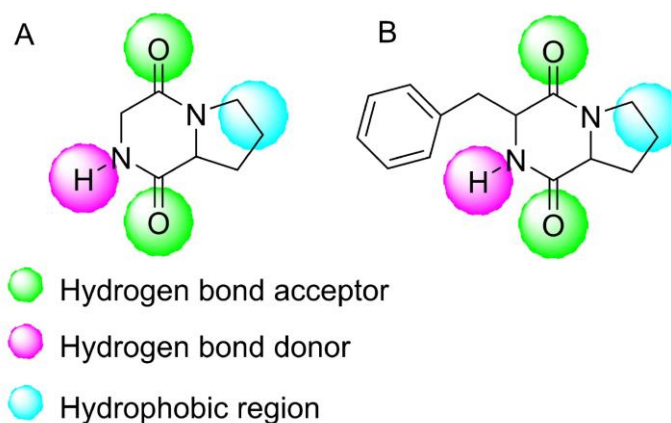

**Figure 2.** (A) Pharmacophore model for neuroprotective DKPs [1]. (B) Mapping of the pharmacophore onto cyclo-(L-Pro-L-Phe).

| A PreADMET website         |           | B                          |           |
|----------------------------|-----------|----------------------------|-----------|
| ID                         | Value     | ID                         | Value     |
| BBB                        | 0.558621  | BBB                        | 0.140492  |
| Buffer_solubility_mg_L     | 12862.3   | Buffer_solubility_mg_L     | 86539.2   |
| Caco2                      | 21.8157   | Caco2                      | 15.0527   |
| CYP_2C19_inhibition        | Non       | CYP_2C19_inhibition        | Non       |
| CYP_2C9_inhibition         | Non       | CYP_2C9_inhibition         | Non       |
| CYP_2D6_inhibition         | Non       | CYP_2D6_inhibition         | Non       |
| CYP_2D6_substrate          | Non       | CYP_2D6_substrate          | Non       |
| CYP_3A4_inhibition         | Non       | CYP_3A4_inhibition         | Non       |
| CYP_3A4_substrate          | Weakly    | CYP_3A4_substrate          | Substrate |
| HIA                        | 95.019141 | HIA                        | 78.052390 |
| MDCK                       | 208.002   | MDCK                       | 0.848824  |
| Pgp_inhibition             | Non       | Pgp_inhibition             | Non       |
| Plasma_Protein_Binding     | 58.809343 | Plasma_Protein_Binding     | 15.841623 |
| Pure_water_solubility_mg_L | 7309.04   | Pure_water_solubility_mg_L | 347579    |
| Skin_Permability           | -3.95645  | Skin_Permability           | -5.13313  |
| SKlogD_value               | 0.648710  | SKlogD_value               | -1.414550 |
| SKlogP_value               | 0.648710  | SKlogP_value               | -1.414550 |
| SKlogS_buffer              | -1.278590 | SKlogS_buffer              | -0.432480 |
| SKlogS_pure                | -1.524050 | SKlogS_pure                | 0.171360  |

**BBB: in vivo blood-brain barrier**  
**penetration (C.brain/C.blood)= 0.558621**

**BBB: in vivo blood-brain barrier**  
**penetration (C.brain/C.blood)= 0.140492**

**Figure 3.** The predicted ADME and BBB values of cyclo-(L-Pro-L-Phe) (A) and CHP (B) using PreADMET website.

**Table 1.** PPAR- $\alpha$  docking simulation results.

| compound | binding affinity (kcal/mol) | H-bond                                                       | Hydrophobic bond                                                                  |
|----------|-----------------------------|--------------------------------------------------------------|-----------------------------------------------------------------------------------|
| WY14643  | -8.3                        | Tyr <sup>464</sup> , His <sup>440</sup> , Ser <sup>280</sup> | Val <sup>324</sup> , Leu <sup>321</sup> , Cys <sup>276</sup> , Thr <sup>279</sup> |
| <b>8</b> | -7.7                        | Thr <sup>283</sup>                                           | Leu <sup>321</sup> , Met <sup>320</sup> , Met <sup>220</sup>                      |

**Table 2.** PPAR- $\beta/\delta$  docking simulation results.

| compound | binding affinity (kcal/mol) | H-bond                                                       | Hydrophobic bond                                                                                                                                                                                                                                          |
|----------|-----------------------------|--------------------------------------------------------------|-----------------------------------------------------------------------------------------------------------------------------------------------------------------------------------------------------------------------------------------------------------|
| GW501516 | -10.5                       | Tyr <sup>437</sup> , His <sup>413</sup> , Thr <sup>253</sup> | Leu <sup>219</sup> , Trp <sup>228</sup> , Val <sup>312</sup> , Val <sup>305</sup> , Val <sup>245</sup> , Leu <sup>303</sup> , Arg <sup>248</sup> , Phe <sup>246</sup> , Cys <sup>249</sup> , Ile <sup>327</sup> , Met <sup>417</sup> , His <sup>413</sup> |
| <b>8</b> | -8.4                        | Gly <sup>308</sup> , Lys <sup>229</sup>                      | Ile <sup>297</sup> , Met <sup>192</sup> , Lys <sup>229</sup>                                                                                                                                                                                              |

**Table 3.** PPAR- $\gamma$  docking simulation results.

| compound      | binding affinity (kcal/mol) | H-bond                                                                                                                      | Hydrophobic bond                                                                                       |
|---------------|-----------------------------|-----------------------------------------------------------------------------------------------------------------------------|--------------------------------------------------------------------------------------------------------|
| Rosiglitazone | -8.6                        | Tyr <sup>473</sup> , His <sup>323</sup> , His <sup>449</sup> , Ser <sup>289</sup> , Gln <sup>286</sup> , Arg <sup>288</sup> | Arg <sup>288</sup> , Ala <sup>292</sup> , Ile <sup>326</sup> , Leu <sup>330</sup> , Cys <sup>285</sup> |

---

|   |      |                                                              |                                                                                                                                |
|---|------|--------------------------------------------------------------|--------------------------------------------------------------------------------------------------------------------------------|
| 8 | -7.5 | His <sup>449</sup> , Ser <sup>289</sup> , Cys <sup>285</sup> | Leu <sup>469</sup> , Tyr <sup>473</sup> , His <sup>323</sup> , His <sup>449</sup> , Arg <sup>288</sup> ,<br>Leu <sup>330</sup> |
|---|------|--------------------------------------------------------------|--------------------------------------------------------------------------------------------------------------------------------|

---

**References:**

1. Faden, A.I.; Movsesyan, V.A.; Fang, X.; Wang, S. Identification of novel neuroprotective agents using pharmacophore modeling. *Chem. Biodivers.* **2005**, *2*, 1564–1570.
